# Supplementary material for: Temozolomide Induces the Acquisition of Invasive Phenotype by O6-Methylguanine-DNA Methyltransferase (MGMT)+ Glioblastoma Cells in a Snail-1/Cx43-Dependent Manner
Source: MDPI journal article supplement (doi:10.3390/ijms22084150), 2021-04-16
Supplement: s1 [file s1]

# Supplementary Material

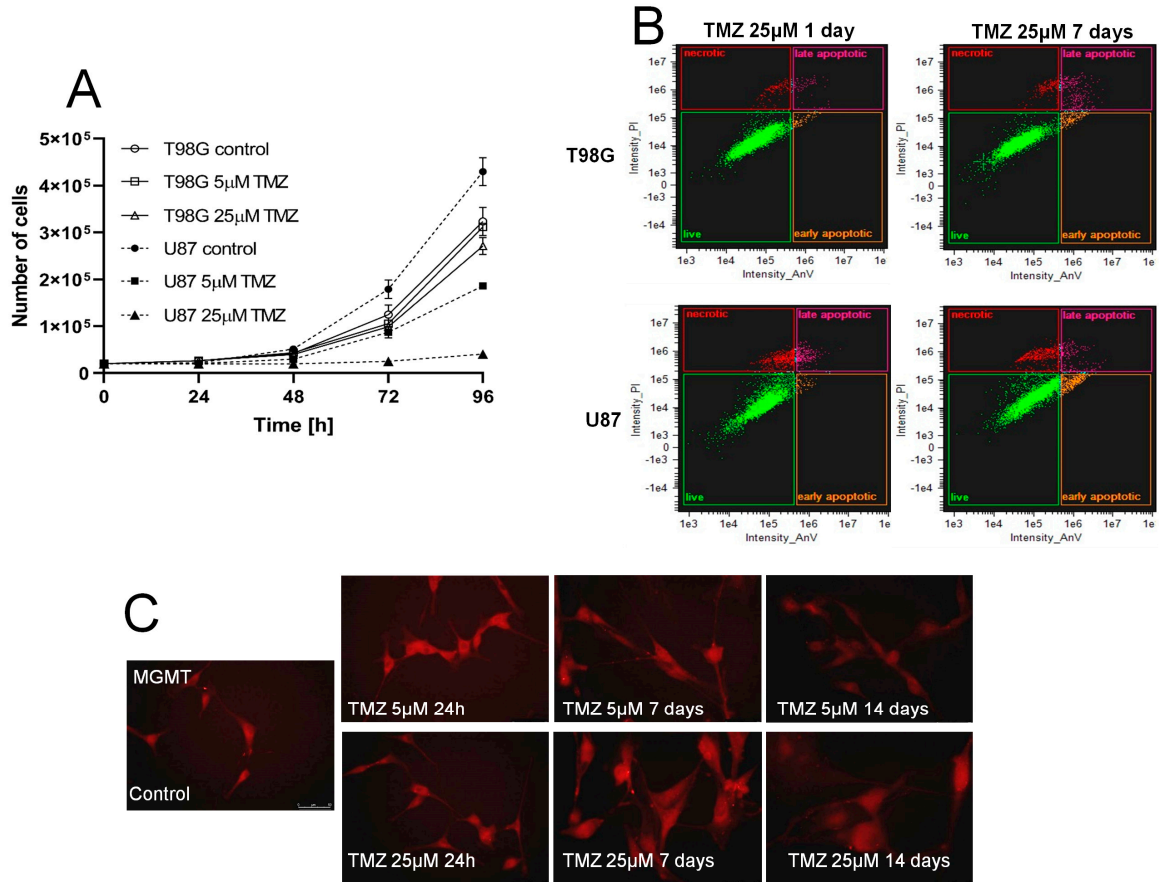

**Figure S1.** Effect of TMZ on the proliferation. (A), apoptosis (B) and MGMT levels (C) in GBM populations. (A) T98G and U87 cells were incubated in the presence of 5 or 25  $\mu$ M TMZ. Their proliferation was estimated after the next 24–96 hours with Coulter Counter. (B) T98G and U87 cells were treated with 25  $\mu$ M TMZ and their apoptotic response was estimated after 24 hours and 7 days with AnnexinV/PI assay. At least 5000 single cells were analyzed, gated according to their area/aspect ratio. (C) TMZ effect on MGMT levels in U87 cells undergone the short- and long-term 5/25  $\mu$ M TMZ treatment. Note relatively high U87 sensitivity to TMZ and the lack of TMZ effects on MGMT levels in U87 cells.

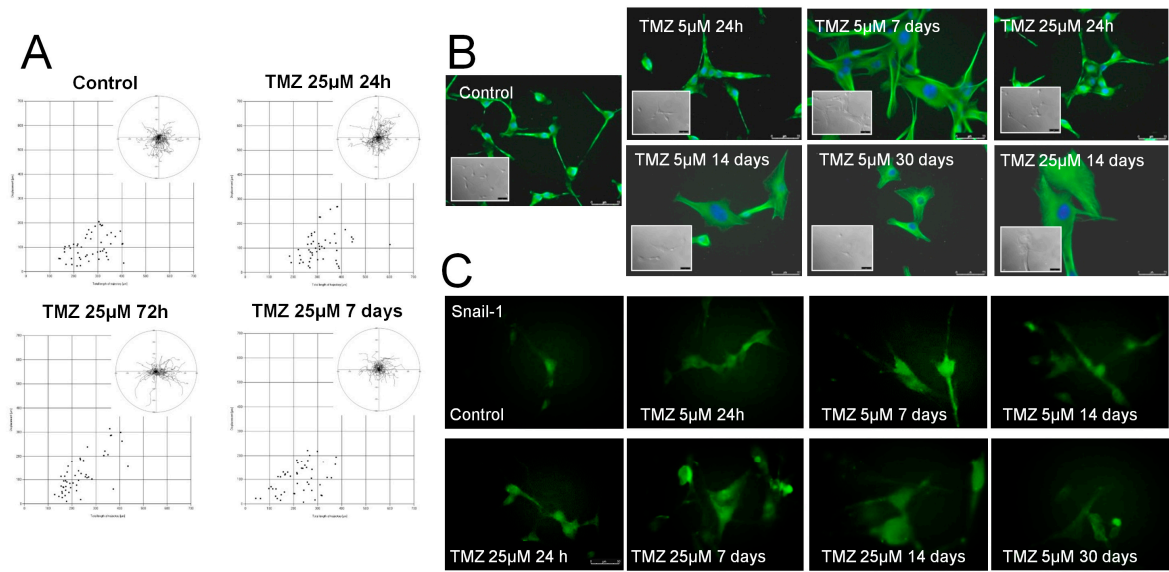

**Figure S2.** Effect of TMZ on the motility, morphology/architecture of microtubular cytoskeleton and Snail-1 levels in U87 cells. (A) U87 cells were seeded at the density of 2 000/well of 12-well plate and incubated for 24 hours before the administration of 25 µM TMZ. Their motility was estimated with time-lapse video microscopy at the indicated time-points. Circular diagrams and dot-plots show trajectories, movement parameters (distance and displacement) at the single cell level. (B) Cells were incubated in the presence of 5/25 µM TMZ, fixed, permeabilized and stained against  $\alpha$ -tubulin (green)/DNA (blue) to visualize cell morphology and microtubular architecture at the indicated time-points). (C) Effect of TMZ on the expression levels of Snail-1 in U87 populations. Scale bars 50 µm. Note the increased spreading degree and the lack of Snail-1 up-regulation in TMZ-treated U87 cells.

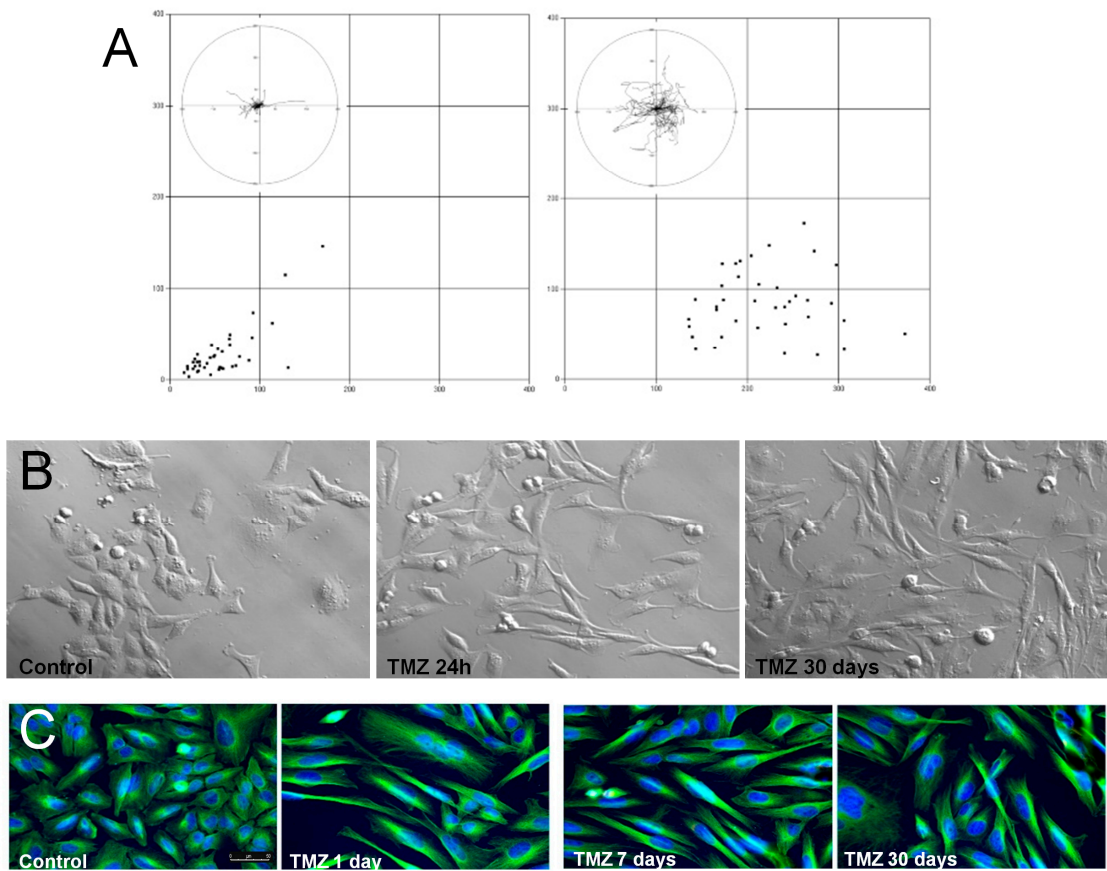

**Figure S3.** (A) Motility of T98G (left) and U87 cells (right) estimated with time-lapse videomicroscopy and presented in circular diagrams/dot-plots, which show single cell trajectories/movement parameters. (B) T98G cells were cultivated in the presence of 25 µM TMZ for 1 and 30 days. Their morphology was

estimated with Nomarski Interference Contrast (NIC) microscopy. (C) Architecture of microtubular cytoskeleton (tubulin-green/DNA-blue) was estimated with immunofluorescence. Cells were incubated in the presence of 25  $\mu$ M TMZ, fixed, permeabilized and stained against  $\alpha$ -tubulin (green)/DNA (blue) to visualize cell morphology/microtubular architecture at the indicated time-points. Scale bar 50  $\mu$ m. Note spindle-like shapes of long-term TMZ-treated T98G cells.

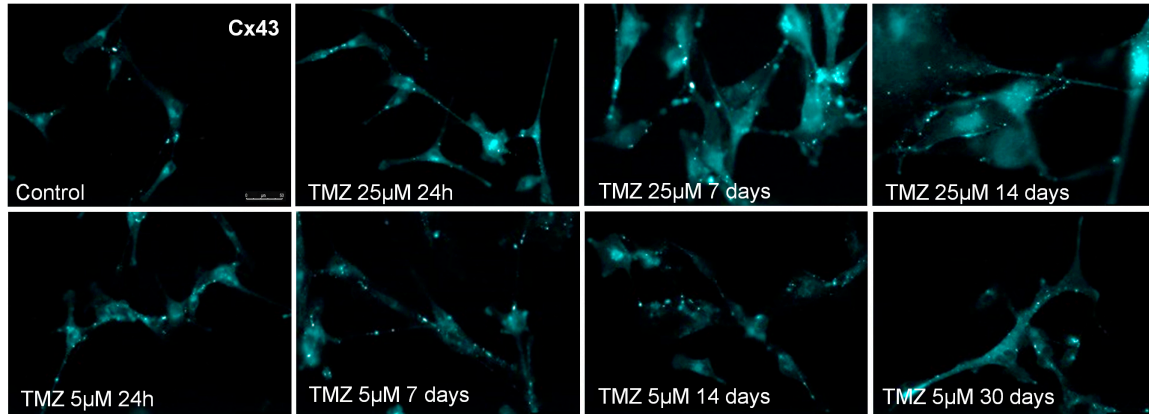

**Figure S4.** Effect of TMZ on the expression levels of Cx43 in U87 populations. Cells were treated with 5/25  $\mu$ M TMZ for up to 30 days and Cx43 levels were estimated with immunofluorescence. Scale bar 50  $\mu$ m.
